# Supplementary material
Source: PubMed Central journal article supplement (PMC5499369)
Supplement: jciinsight-2-93187-s001.pdf [file jciinsight-2-93187-s001.pdf]

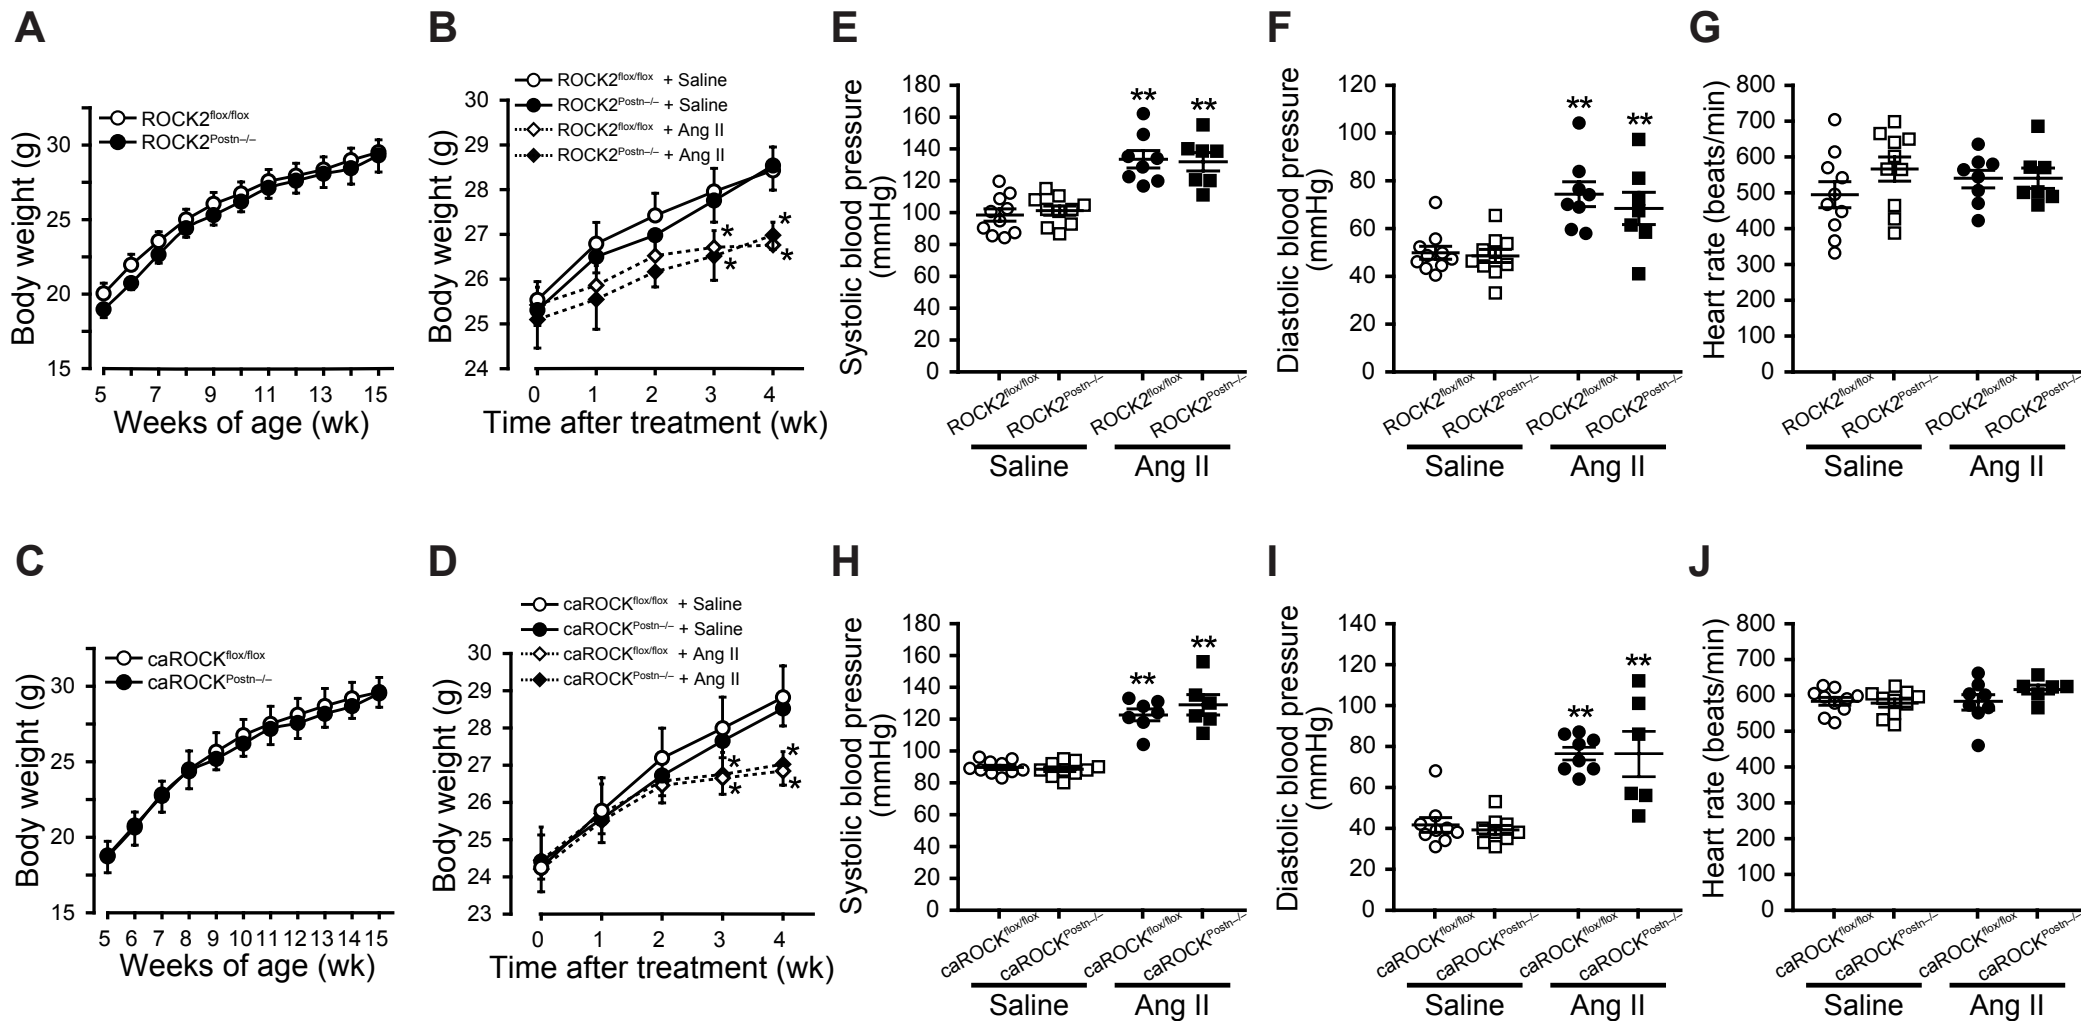

**Supplemental Figure 1. Body weight and hemodynamic changes in each genotype of mice after saline or angiotensin II (Ang II) infusion. (A–D)** Body weight gain over time and during infusion of saline or Ang II infusion for 4wk in fibroblast-specific ROCK2-deficient (ROCK2<sup>Postn-/-</sup>) and littermate control (ROCK2<sup>flox/flox</sup>) mice, and fibroblast-specific constitutively active knock-in ROCK (caROCK<sup>Postn-/-</sup>) and littermate control (caROCK<sup>flox/flox</sup>) mice ( $n=10$  each). **(E–J)** Systolic and diastolic blood pressure and heart rate among the four genotypes at 4wk after saline or Ang II infusion ( $n=6-10$  each). \* $P<0.05$ , \*\* $P<0.01$  vs. saline-treated each genotype. Data are expressed as mean $\pm$ SEM.  $P$  values were calculated using unpaired Student' s  $t$ -test or one-way ANOVA with Tukey' s HSD test.

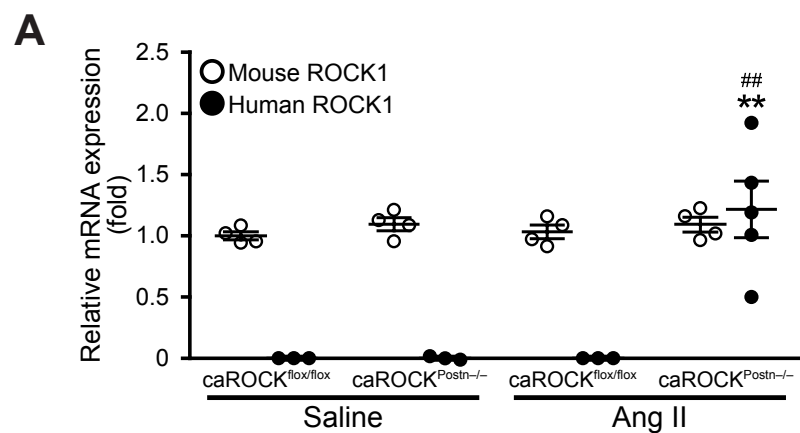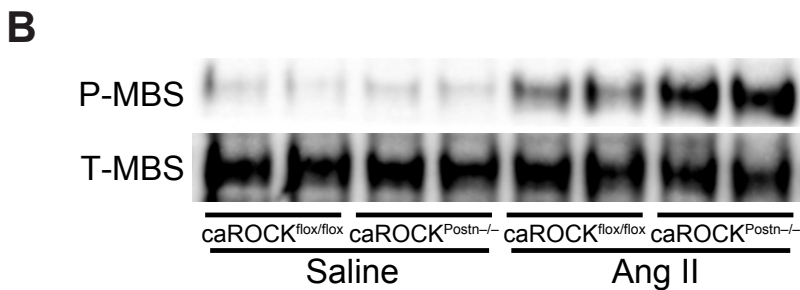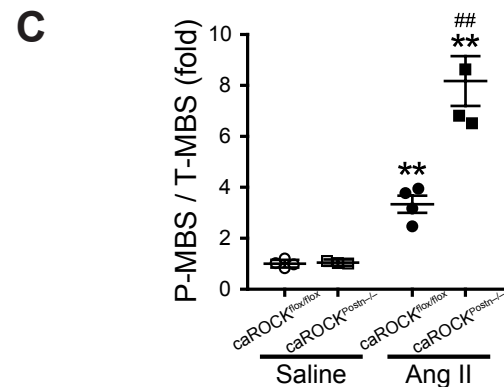**D**Grade 1 diastolic dysfunction  
ROCK activity 0.40Grade 3 diastolic dysfunction  
ROCK activity 2.31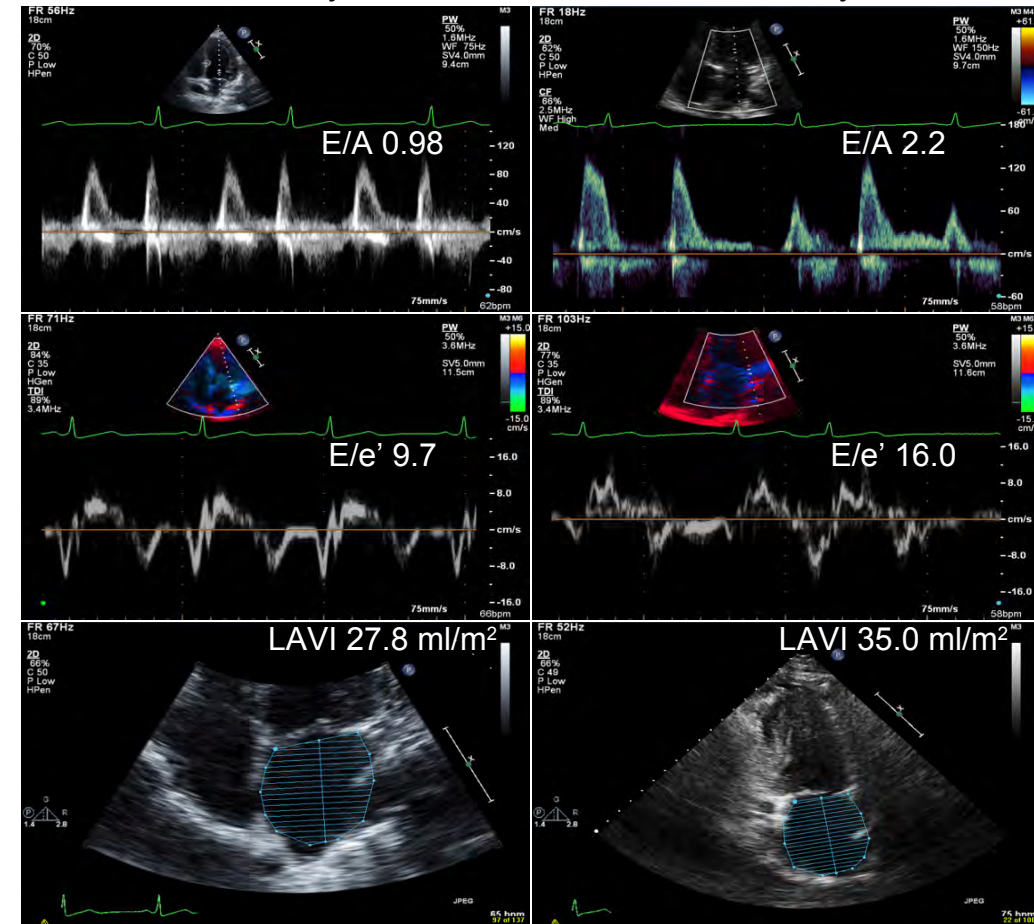

**Supplemental Figure 2. Increased ROCK activity in cardiac fibroblasts (CFs) from fibroblast-specific constitutively active ROCK knock-in (caROCK<sup>Postn-/-</sup>) mice after angiotensin II (Ang II) infusion. (A)** Quantitative RT-PCR analysis of mouse ROCK1 and human ROCK1 mRNA expression in CFs isolated from caROCK<sup>Postn-/-</sup> and littermate control (caROCK<sup>flox/flox</sup>) mice at 4wk after saline or Ang II infusion ( $n=3-4$  each).  $**P<0.01$  vs. human ROCK1 expression in CFs from saline-treated caROCK<sup>Postn-/-</sup> mice.  $##P<0.01$  vs. human ROCK1 expression in CFs from Ang II-treated caROCK<sup>flox/flox</sup> mice. **(B)** Representative immunoblots of ROCK activity, as assessed by the ratio of phosphorylated form of the myosin-binding subunit (MBS) to total MBS (p-MBS/t-MBS), in CFs from caROCK<sup>Postn-/-</sup> and caROCK<sup>flox/flox</sup> mice at 4wk after saline or Ang II infusion. **(C)** Quantitative analysis of ROCK activity in CFs from caROCK<sup>Postn-/-</sup> and caROCK<sup>flox/flox</sup> mice ( $n=3-4$  each).  $**P<0.01$  vs. saline-treated each genotype.  $##P<0.01$  vs. Ang II-treated caROCK<sup>flox/flox</sup> mice. Data are expressed as mean $\pm$ SEM.  $P$  values were calculated using one-way ANOVA with Tukey' s HSD test. **(D)** Representative echocardiographic images of transmitral velocity (E/A) ratio, mitral E/e' ratio, and left atrial volume index (LAVI) from patients with grade 1 diastolic dysfunction and those with grade 3 diastolic dysfunction and higher leukocyte ROCK activity.

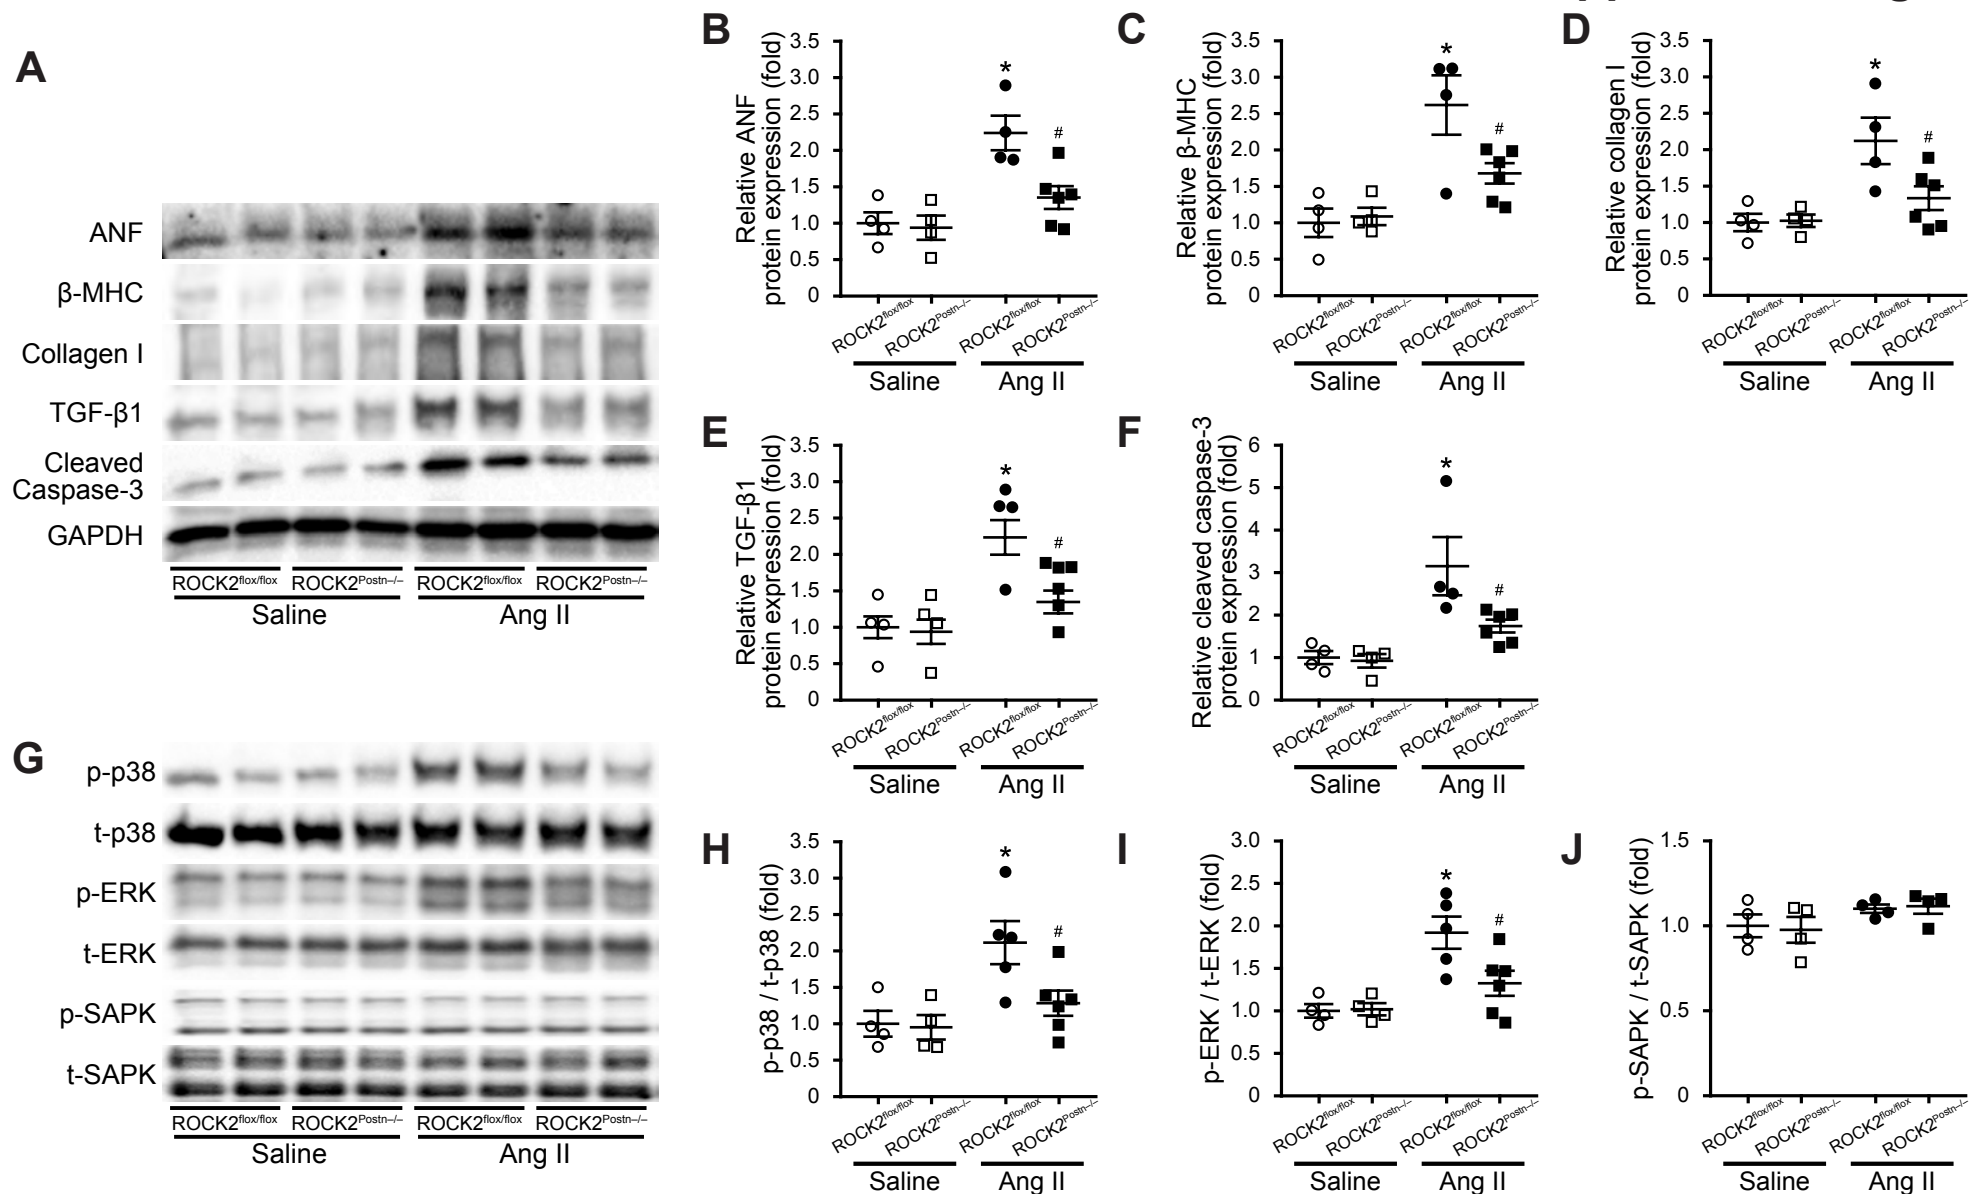

**Supplemental Figure 3. Down-regulation of signaling pathways involved in cardiac remodeling and apoptosis in hearts from fibroblast-specific ROCK2-deficient (ROCK2<sup>Postn<sup>-/-</sup></sup>) mice treated with angiotensin II (Ang II). (A–F)** Representative immunoblots and densitometric quantification of hypertrophic markers of atrial natriuretic factor (ANF) and beta-myosin heavy chain (β-MHC), a fibrotic marker of collagen type I, TGF-β1, and an apoptosis marker of cleaved caspase-3 in heart tissues from ROCK2<sup>Postn<sup>-/-</sup></sup> and littermate control (ROCK2<sup>flox/flox</sup>) mice at 4 wk after saline or Ang II infusion. (*n*=4-6 each). **(G–J)** Representative immunoblots of mitogen-activated protein kinases (p38 MAPK, ERK, and SAPK) and densitometric quantification of phosphorylated p38 MAPK, ERK, and SAPK, normalized to respective total protein, in heart tissues from ROCK2<sup>Postn<sup>-/-</sup></sup> and ROCK2<sup>flox/flox</sup> mice treated with saline or Ang II (*n*=4-6 each). \**P*<0.05 vs. saline-treated ROCK2<sup>flox/flox</sup> mice. #*P*<0.05 vs. Ang II-treated ROCK2<sup>flox/flox</sup> mice. Data are expressed as mean±SEM. *P* values were calculated using one-way ANOVA with Tukey's HSD test.

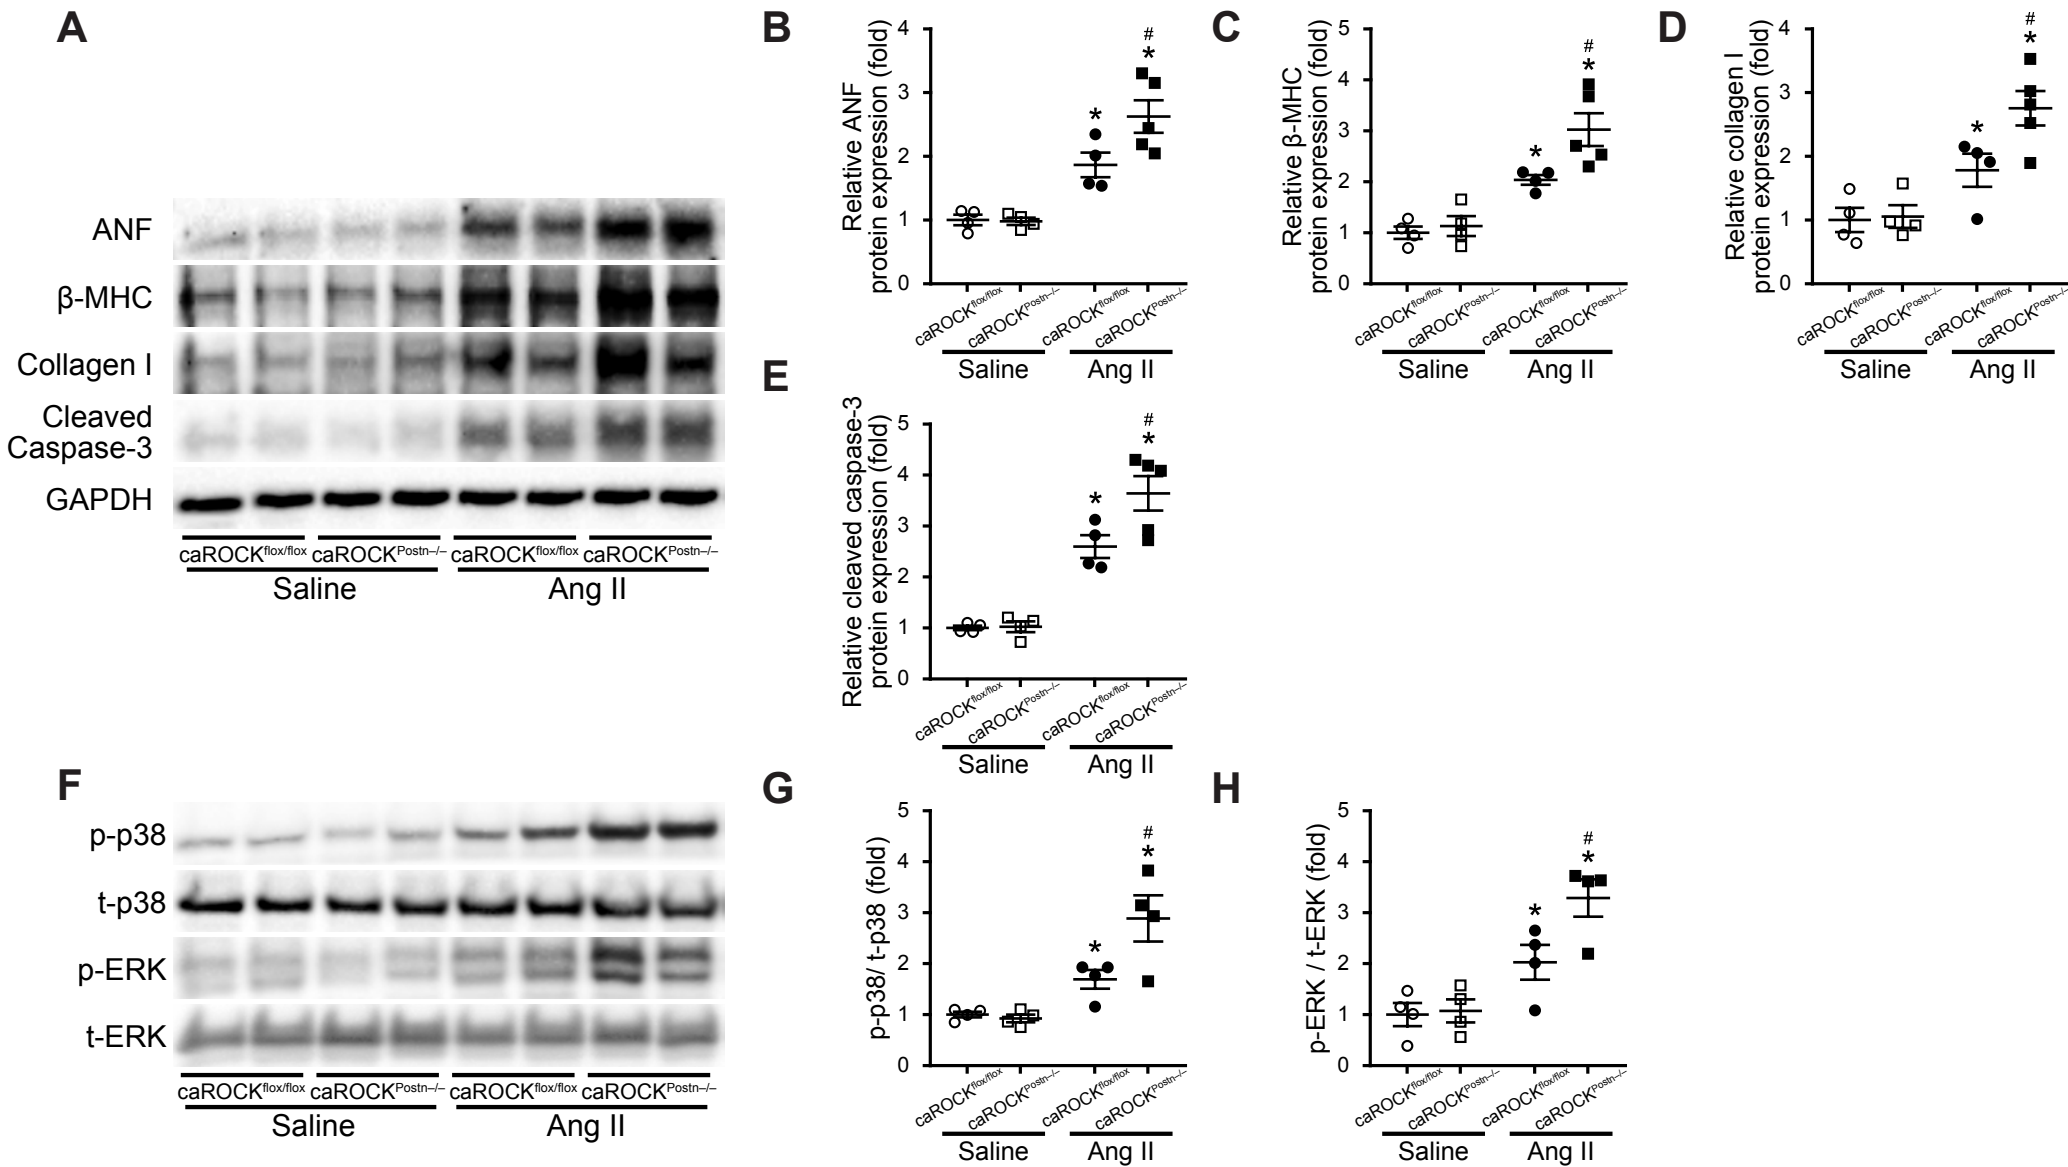

**Supplemental Figure 4. Up-regulation of signaling pathways involved in cardiac remodeling and apoptosis in hearts from fibroblast-specific constitutively active knock-in ROCK (caROCK<sup>Postn-/-</sup>) mice treated with angiotensin II (Ang II).** (A–E) Representative immunoblots and densitometric quantification of hypertrophic markers of atrial natriuretic factor (ANF) and beta-myosin heavy chain (β-MHC) and, a fibrotic marker of collagen type I, and an apoptosis marker of cleaved caspase-3 in heart tissues from caROCK<sup>Postn-/-</sup> and littermate control (caROCK<sup>flox/flox</sup>) mice at 4 wk after saline or Ang II infusion ( $n=4-5$  each). (F–H) Representative immunoblots and densitometric quantification of mitogen-activated protein kinases (p38 MAPK and ERK), normalized to respective total protein, in heart tissues from caROCK<sup>Postn-/-</sup> and caROCK<sup>flox/flox</sup> mice treated with saline or Ang II ( $n=4$  each). \* $P<0.05$  vs. saline-treated each genotype. # $P<0.05$  vs. Ang II-treated caROCK<sup>flox/flox</sup> mice. Data are expressed as mean $\pm$ SEM.  $P$  values were calculated using one-way ANOVA with Tukey's HSD test.



A

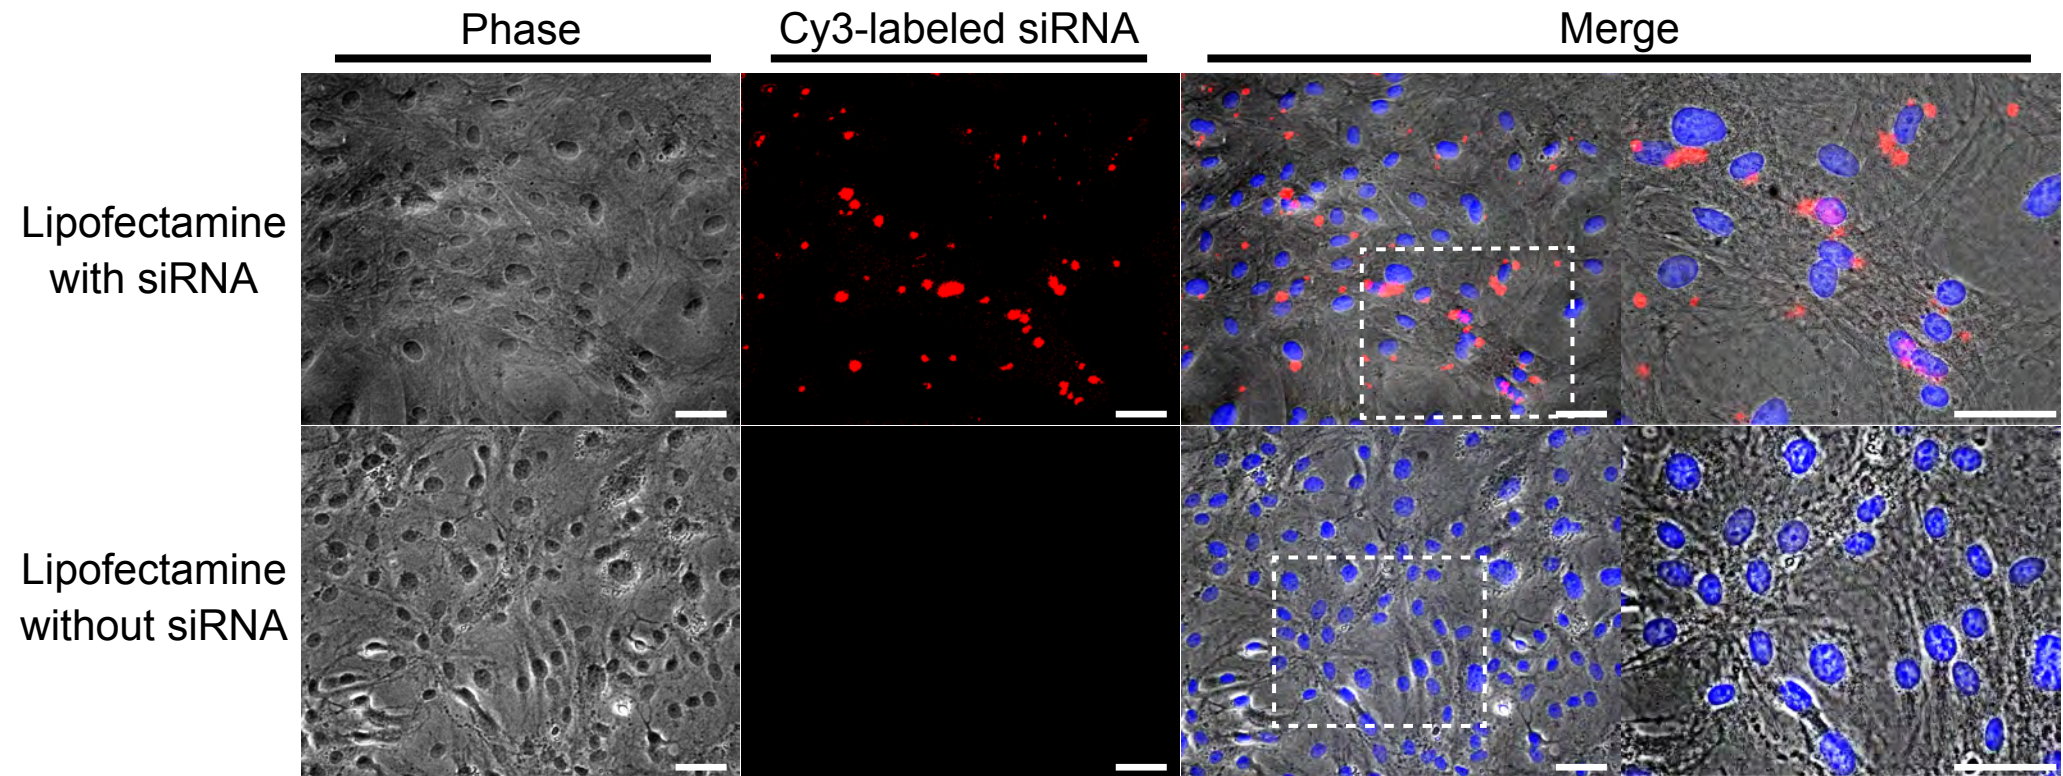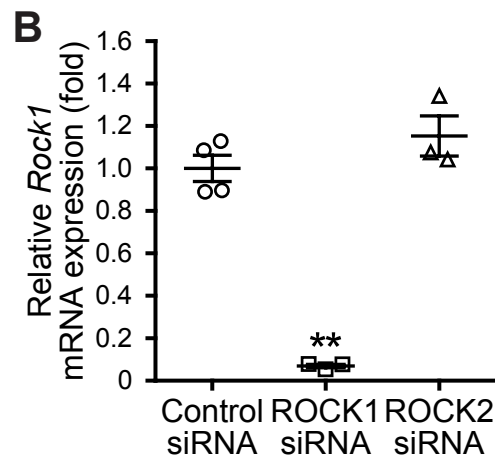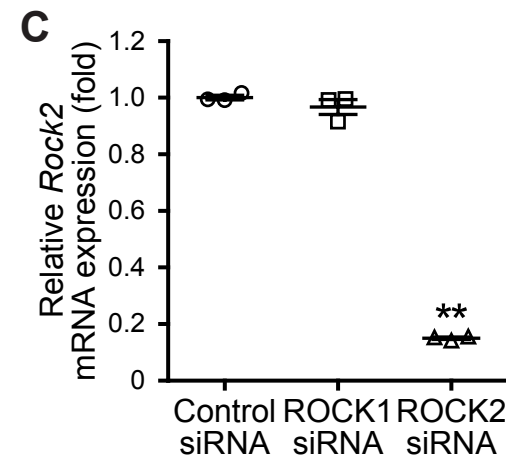

**Supplemental Figure 5. Effective siRNA knockdown of ROCK1 and ROCK2 expression in rat neonatal cardiac fibroblasts (RNCFs).** (A) Representative phase and fluorescence images of RNCFs transfected with or without Cy3-labeled (red) control siRNA using Lipofectamine RNAiMax Reagent ( $n=3$  each). Nuclei are stained with DAPI (blue). Scale bars, 50  $\mu\text{m}$ . (B and C) Quantitative RT-PCR analysis of *Rock1* and *Rock2* mRNA expression in RNCFs transfected with ROCK1 siRNA or ROCK2 siRNA ( $n=3-4$  each). \*\* $P<0.01$  vs. RNCFs transfected with control siRNA. Data are expressed as mean $\pm$ SEM.  $P$  values were calculated using one-way ANOVA with Tukey' s HSD test.
